# Supplementary material
Source: PubMed Central journal article supplement (PMC5394874)
Supplement: b34f7f72f950b7cbd3b2bdf5e06f5cd0_2016_146738-Disclosures_and_Contributions.pdf [file b34f7f72f950b7cbd3b2bdf5e06f5cd0_2016_146738-Disclosures_and_Contributions.pdf]

Haematologica  
HAEMATOL/2016/146738  
Version 3

Comparison of two dosing schedules for subcutaneous injections of low-dose anti-CD20 veltuzumab in relapsed immune thrombocytopenia

Howard A. Liebman, Mansoor N. Saleh, James B. Bussel, O. George Negrea, Heather Horne, William A. Wegener, and David M. Goldenberg

Disclosures: Research grants from Immunomedics were provided to each participating institution to support this study. Heather Horne, David M. Goldenberg and William A. Wegener have employment, stock, and/or stock options with Immunomedics, Inc. The other authors have no conflicts of interest to declare.

Contributions: DMG and WAW were responsible for study design, data analysis and the initial manuscript. HAL, MNS, JBB, and OGN were responsible for provision of patients, reviewing the results, reviewing and modifying the manuscript. HH oversaw study conduct and data collection. All authors were responsible for review, revision and approval of the manuscript.
